# Supplementary material
Source: PubMed Central journal article supplement (PMC10692427)
Supplement: glad197_suppl_supplementary_material.pdf [file glad197_suppl_supplementary_material.pdf]

**Validation of the Pittsburgh Performance Fatigability Index in the Study of Muscle,  
Mobility and Aging (SOMMA)**

**AUTHORS:** Yujia (Susanna) Qiao<sup>1</sup>, PhD, ScM; Jaroslaw Harezlak<sup>2</sup>, PhD; Peggy M. Cawthon<sup>3,4</sup>, PhD; Steven R. Cummings, PhD<sup>3</sup>; Daniel E. Forman<sup>5</sup>, MD; Bret H. Goodpaster<sup>6</sup>, PhD; Marquis Hawkins<sup>1</sup>, PhD; Kyle D. Moored<sup>7</sup>, PhD; Barbara J. Nicklas<sup>8</sup>, PhD; Frederico G.S. Toledo<sup>9</sup>, MD; Pamela E. Toto<sup>10</sup>, PhD; Adam J. Santanasto<sup>1</sup>, PhD, MPH; Elsa S. Strotmeyer<sup>1</sup>, PhD, MPH; Anne B. Newman<sup>1</sup>, MD, MPH; Nancy W. Glynn<sup>1</sup>, PhD

**Table S1.** Discriminant power of performance fatigability severity based on identified PPFi cut-points against gait speed, SPPB, chair stand speed, leg peak power, VO<sub>2</sub>peak and perceived fatigability in the Study of Muscle, Mobility and Aging (SOMMA) (N=805<sup>1</sup>)

| Physical performance and perceived fatigability measures | Performance fatigability severity strata |                            |                                                                          |                            |                                                                                      |                            |
|----------------------------------------------------------|------------------------------------------|----------------------------|--------------------------------------------------------------------------|----------------------------|--------------------------------------------------------------------------------------|----------------------------|
|                                                          | No performance fatigability (PPFI=0)     |                            | Mild performance fatigability (0<PPFI<3.5 for women; 0<PPFI<5.4 for men) |                            | Moderate-to-severe performance fatigability (PPFI ≥3.5 for women; PPFi ≥5.4 for men) |                            |
|                                                          | <i>Standardized Beta (SE)</i>            | Adjusted mean <sup>2</sup> | <i>Standardized Beta (SE)</i>                                            | Adjusted mean <sup>2</sup> | <i>Standardized Beta (SE)</i>                                                        | Adjusted mean <sup>2</sup> |
| Gait speed <sup>3</sup> , m/s                            | Ref                                      | 1.17                       | -1.34 (0.05)                                                             | 0.93                       | -1.71 (0.07)                                                                         | 0.87                       |
| SPPB score, 0-12                                         | Ref                                      | 10.39                      | -0.62 (0.07)                                                             | 9.31                       | -0.84 (0.11)                                                                         | 8.91                       |
| Chair stand speed, stands/s                              | Ref                                      | 0.43                       | -0.70 (0.07)                                                             | 0.35                       | -0.81 (0.11)                                                                         | 0.34                       |
| Leg peak power <sup>3</sup> , watts/kg                   | Ref                                      | 5.17                       | -0.53 (0.06)                                                             | 4.27                       | -0.60 (0.09)                                                                         | 4.14                       |
| VO <sub>2</sub> peak <sup>4</sup> , mL/kg/min            | Ref                                      | 21.89                      | -0.69 (0.06)                                                             | 17.53                      | -0.80 (0.10)                                                                         | 17.26                      |

Abbreviations: PPFi = Pittsburgh Performance Fatigability Index; SPPB = Short Physical Performance Battery; PFS = Pittsburgh Fatigability Scale; RPE = Rating of Perceived Exertion

<sup>1</sup> There were n=1 participant missing SPPB score and chair stand speed, n=34 participants missing leg peak power, n=51 missing VO<sub>2</sub>peak

<sup>2</sup> Adjusted means were calculated using generalized linear regressions after adjusting for study site, age, sex, race, height, weight (except for the models with leg peak power and VO<sub>2</sub>peak), and smoking status

<sup>3</sup> Obtained from usual-paced 400m walk

(A)

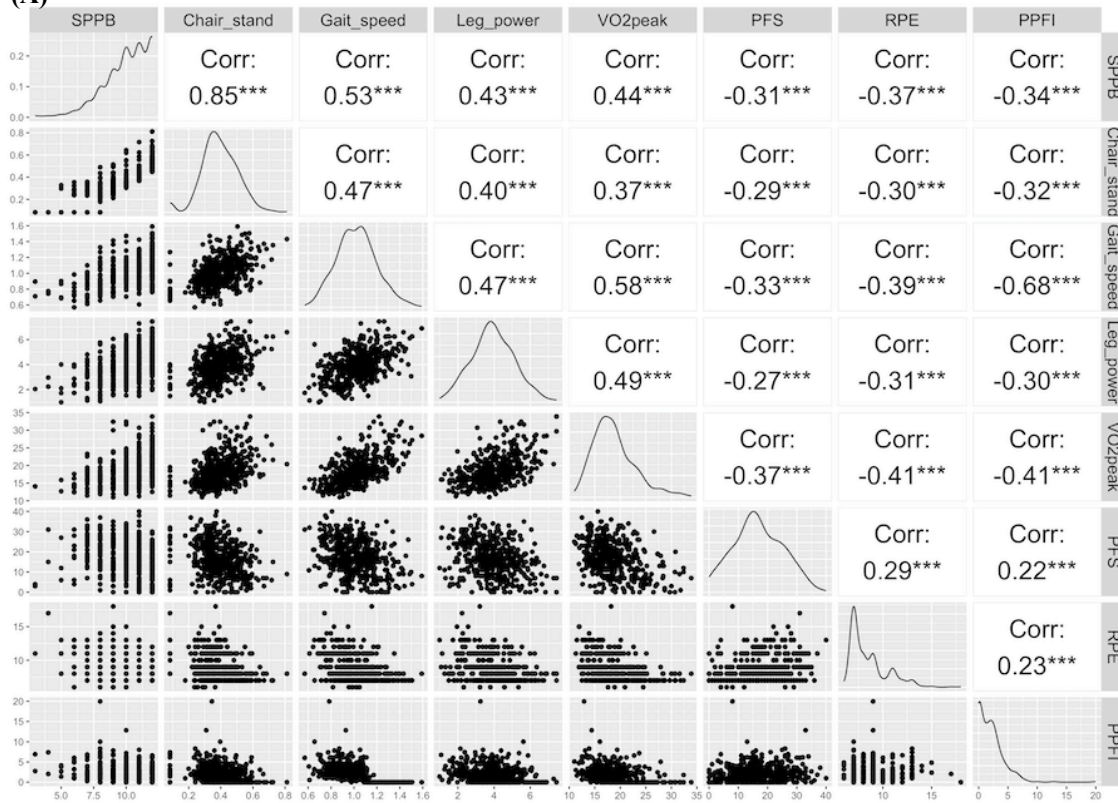

(B)

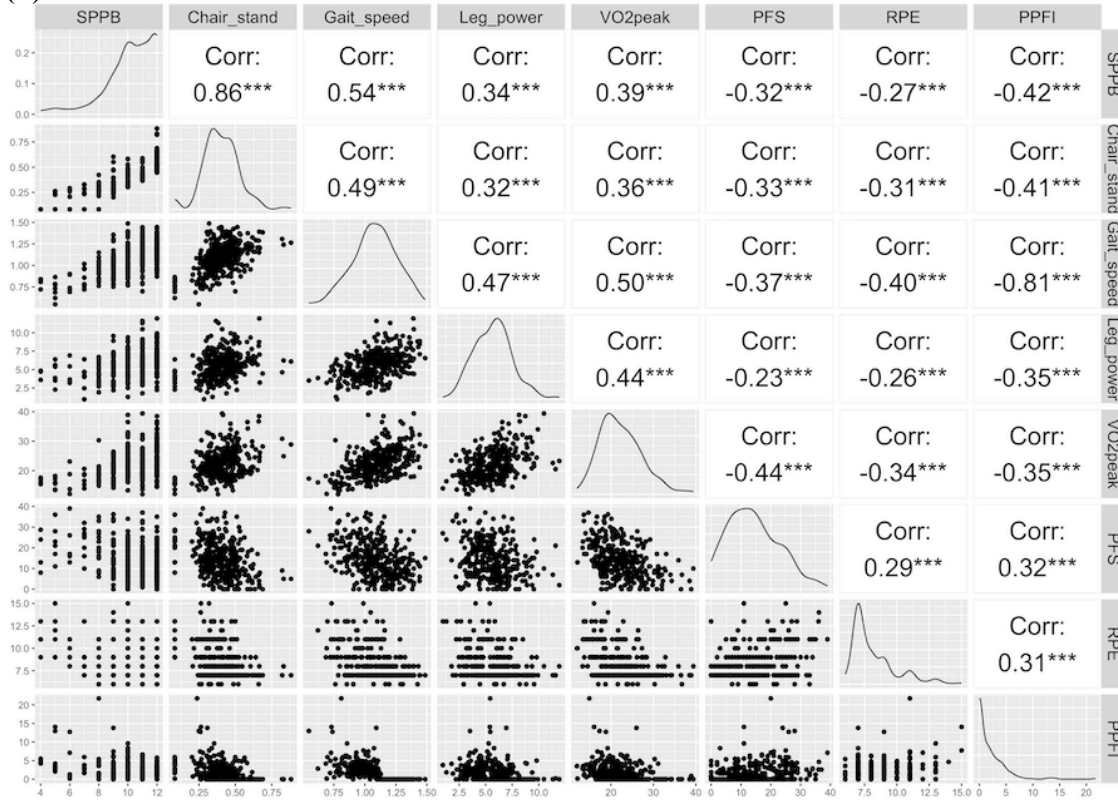

**Figure S1.** Spearman correlations between PFFI scores and SPPB, chair stand speed, 400m gait speed, leg peak power, VO<sub>2</sub>peak, and perceived fatigability measures stratified by sex<sup>1</sup> in the Study of Muscle, Mobility and Aging (SOMMA): (A) n=469 for women, (B) n=336 for men  
\*\*\* P<0.001, \*\* P<0.01, \*P<0.05

Abbreviations: SPPB = Short Physical Performance Battery; PFS = Pittsburgh Fatigability Scale; RPE = Borg Rating of Perceived Exertion; PFFI = Pittsburgh Performance Fatigability Index

<sup>1</sup> There were n=1 participant missing SPPB score and chair stand speed, n=34 participants missing leg peak power, n=51 missing VO<sub>2</sub>peak, n=6 missing PFS Physical scores, n=34 missing RPE fatigability in the total sample

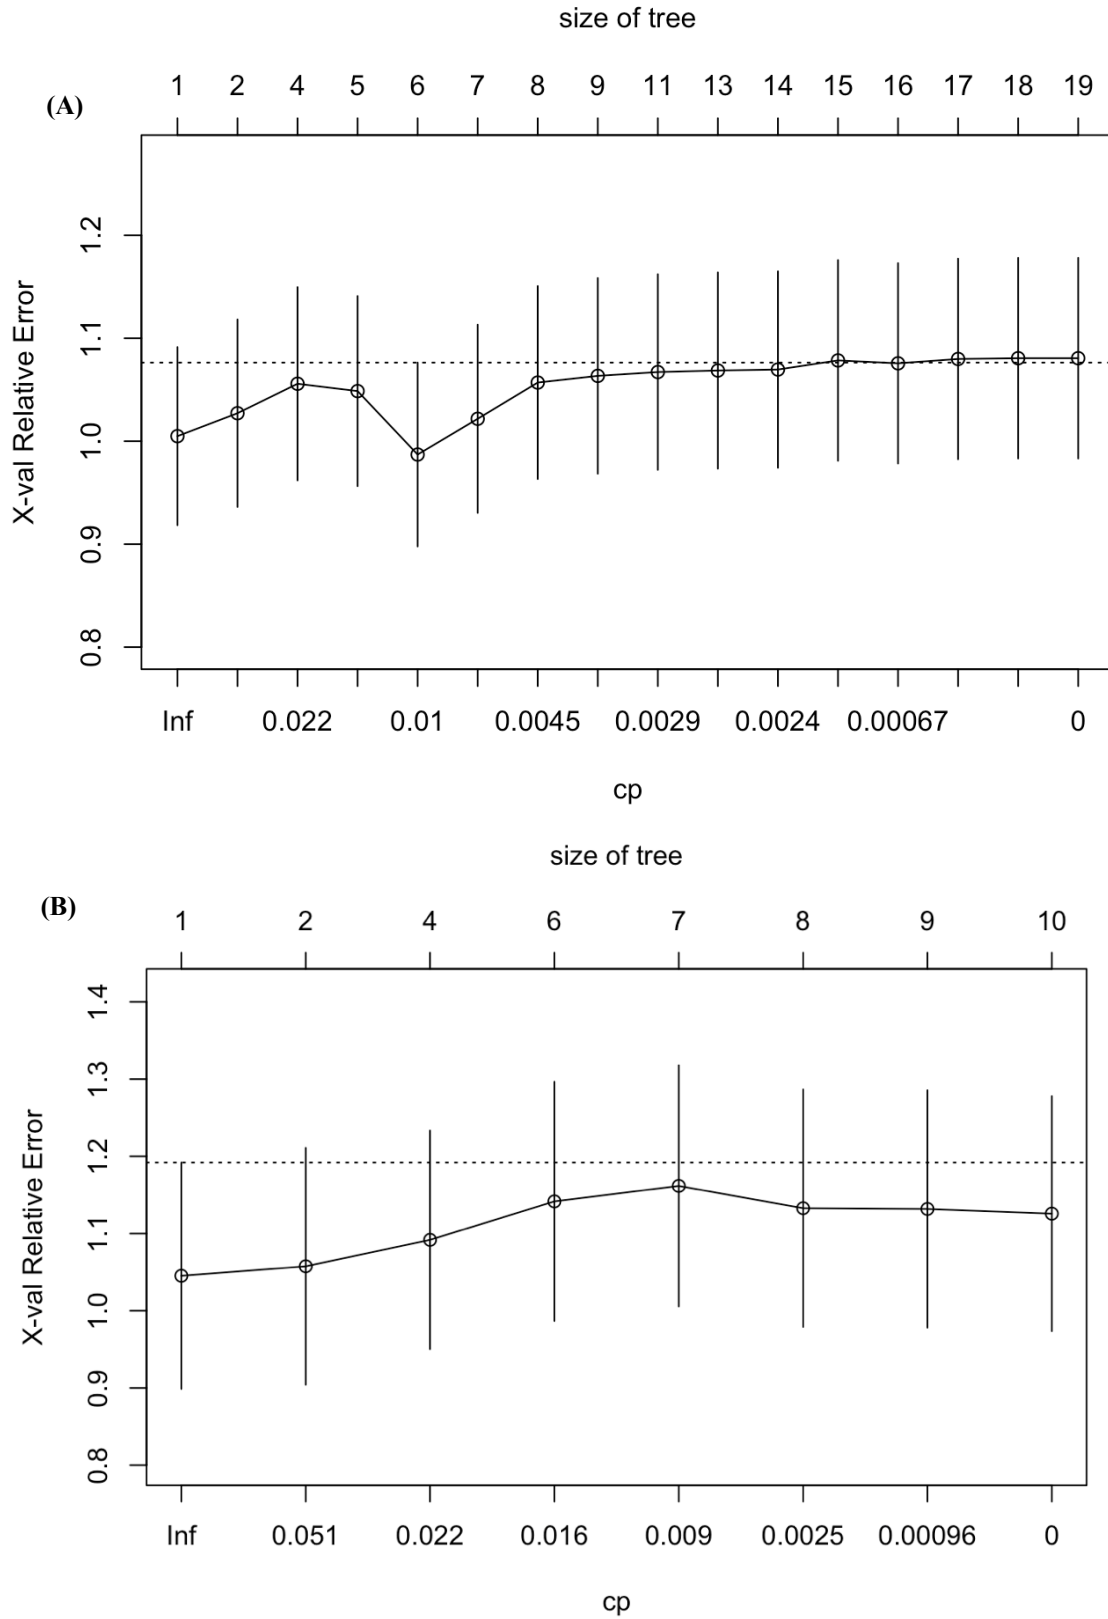

**Figure S2.** Cross-validation results from CART to generate sex-specific the Pittsburgh Performance Fatigability Index (PPFI) cutpoints in the Study of Muscle, Mobility and Aging

(SOMMA): (A) n=469 for women, (B) n=336 for men

Abbreviations: CART = the classification and regression tree, cp = complexity
